# Supplementary material
Source: PubMed Central journal article supplement (PMC7966104)
Supplement: 2029_MOCresults.pdf [file 2029_MOCresults.pdf]

**On-line Table: Maintenance of Certification Survey Results**

**Survey Questions**

|                                                                                                                                                                                                               |              |                |
|---------------------------------------------------------------------------------------------------------------------------------------------------------------------------------------------------------------|--------------|----------------|
| 1. Are you registered with the American Board of Radiology for the maintenance of certification (MOC) process?                                                                                                |              |                |
| Answered question                                                                                                                                                                                             |              | 1074           |
| Skipped question                                                                                                                                                                                              |              | 11             |
|                                                                                                                                                                                                               | Response (%) | Response Count |
| Yes                                                                                                                                                                                                           | 81.8         | 878            |
| No                                                                                                                                                                                                            | 18.2         | 196            |
| 2. Have you taken the American Board of Radiology subspecialty maintenance of certification (MOC) examination?                                                                                                |              |                |
| Answered question                                                                                                                                                                                             |              | 1073           |
| Skipped question                                                                                                                                                                                              |              | 12             |
|                                                                                                                                                                                                               | Response (%) | Response Count |
| Yes                                                                                                                                                                                                           | 50.6         | 543            |
| No                                                                                                                                                                                                            | 49.4         | 530            |
| 3. If yes, in what year?                                                                                                                                                                                      |              |                |
| Answered question                                                                                                                                                                                             |              | 545            |
| Skipped question                                                                                                                                                                                              |              | 540            |
|                                                                                                                                                                                                               | Response (%) | Response Count |
| 2004                                                                                                                                                                                                          | 4.4          | 24             |
| 2005                                                                                                                                                                                                          | 26.4         | 144            |
| 2006                                                                                                                                                                                                          | 26.2         | 143            |
| 2007                                                                                                                                                                                                          | 15.6         | 85             |
| 2008                                                                                                                                                                                                          | 17.8         | 97             |
| 2009                                                                                                                                                                                                          | 9.5          | 52             |
| 4. If no, why have you not taken the recertification test?                                                                                                                                                    |              |                |
| Answered question                                                                                                                                                                                             |              | 558            |
| Skipped question                                                                                                                                                                                              |              | 527            |
|                                                                                                                                                                                                               | Response (%) | Response Count |
| I am not due for it yet (ie, it has been less than 10 years since I was initially certified with the subspecialty neuroradiology CAQ examination)                                                             | 57.7         | 322            |
| I am scheduled for it in 2009                                                                                                                                                                                 | 6.6          | 37             |
| I no longer practice neuroradiology as >50% of average workload                                                                                                                                               | 3.9          | 22             |
| I do not support the process of maintenance of certification or do not find it valuable                                                                                                                       | 10.4         | 58             |
| I plan to retire shortly                                                                                                                                                                                      | 2.9          | 16             |
| I was unaware I had to take the maintenance of certification exam (for more information see <a href="http://www.theabr.org/moc/moc_neuro_landing.html">http://www.theabr.org/moc/moc_neuro_landing.html</a> ) | 3.6          | 20             |
| Other (please specify)                                                                                                                                                                                        | 14.9         | 83             |
| 5. Have you completed self-assessment modules (SAMs) as part of the maintenance of certification (MOC) process? (20 SAMs required in 10-year period) (See ASNR eCME for online SAMs.)                         |              |                |
| Answered question                                                                                                                                                                                             |              | 1067           |
| Skipped question                                                                                                                                                                                              |              | 18             |
|                                                                                                                                                                                                               | Response (%) | Response Count |
| Yes                                                                                                                                                                                                           | 69.0         | 736            |
| No                                                                                                                                                                                                            | 31.0         | 331            |
| 6. If yes, how many?                                                                                                                                                                                          |              |                |
| Answered question                                                                                                                                                                                             |              | 749            |
| Skipped question                                                                                                                                                                                              |              | 336            |
|                                                                                                                                                                                                               | Response (%) | Response Count |
| 1-2                                                                                                                                                                                                           | 13.1         | 98             |
| 3-4                                                                                                                                                                                                           | 28.3         | 212            |
| 5-6                                                                                                                                                                                                           | 30.7         | 230            |
| 7-8                                                                                                                                                                                                           | 11.2         | 84             |
| > 8                                                                                                                                                                                                           | 16.7         | 125            |
| 7. If no, I have not completed any self-assessment modules (SAMs) because:                                                                                                                                    |              |                |
| Answered question                                                                                                                                                                                             |              | 361            |
| Skipped question                                                                                                                                                                                              |              | 724            |
|                                                                                                                                                                                                               | Response (%) | Response Count |
| I no longer practice neuroradiology as >50% of average workload                                                                                                                                               | 4.7          | 17             |
| I do not support the process of maintenance of certification with its requirement of 20 SAMs in 10 years                                                                                                      | 19.7         | 71             |
| I plan to retire soon                                                                                                                                                                                         | 4.4          | 16             |
| I was unaware I had to complete SAMs for MOC (for more information see <a href="http://www.theabr.org/moc/moc_neuro_landing.html">http://www.theabr.org/moc/moc_neuro_landing.html</a> )                      | 12.5         | 45             |
| I do not know where SAMs are offered                                                                                                                                                                          | 9.1          | 33             |
| I plan to take them at a later date                                                                                                                                                                           | 34.3         | 124            |
| Other (please specify)                                                                                                                                                                                        | 15.2         | 55             |

**On-line Table: Maintenance of Certification Survey Results**

**Survey Questions**

|                                                                                                                                                  |              |  |                |
|--------------------------------------------------------------------------------------------------------------------------------------------------|--------------|--|----------------|
| 8. What will be the primary source for your 25 CME credit hour annual requirement for maintenance of certification?                              |              |  |                |
| Answered question                                                                                                                                |              |  | 976            |
| Skipped question                                                                                                                                 |              |  | 109            |
|                                                                                                                                                  | Response (%) |  | Response Count |
| ASNR 2010 Annual Meeting                                                                                                                         | 23.2%        |  | 226            |
| RSNA                                                                                                                                             | 8.0          |  | 78             |
| Other national/international society meetings                                                                                                    | 22.5         |  | 220            |
| Postgraduate CME courses                                                                                                                         | 24.6         |  | 240            |
| Web-based CME lectures                                                                                                                           | 21.7         |  | 212            |
| Other (please specify)                                                                                                                           |              |  | 125            |
| 9. Where do you stand on your practice quality improvement (PQI) project? (For more info on PQI and an online lecture, see the ASNR MOC portal.) |              |  |                |
| Answered question                                                                                                                                |              |  | 1057           |
| Skipped question                                                                                                                                 |              |  | 28             |
|                                                                                                                                                  | Response (%) |  | Response Count |
| Have not started it                                                                                                                              | 46.4         |  | 490            |
| Have registered it but not started it                                                                                                            | 8.2          |  | 87             |
| Collecting data                                                                                                                                  | 18.0         |  | 190            |
| Analyzing data                                                                                                                                   | 3.4          |  | 36             |
| Creating action plan                                                                                                                             | 4.1          |  | 43             |
| Creating revised action plan                                                                                                                     | 1.7          |  | 18             |
| Completed it                                                                                                                                     | 7.9          |  | 83             |
| Am unaware of what you are speaking                                                                                                              | 10.4         |  | 110            |
| 10. Would you like ASNR to help you with the MOC process?                                                                                        |              |  |                |
| Answered question                                                                                                                                |              |  | 1017           |
| Skipped question                                                                                                                                 |              |  | 68             |
|                                                                                                                                                  | Response (%) |  | Response Count |
| Yes                                                                                                                                              | 61.8         |  | 628            |
| No                                                                                                                                               | 38.2         |  | 389            |
| 11. If yes, how can we help?                                                                                                                     |              |  |                |
| Answered question                                                                                                                                |              |  | 453            |
| Skipped question                                                                                                                                 |              |  | 632            |
|                                                                                                                                                  |              |  | Response Count |
|                                                                                                                                                  |              |  | 453            |
| 12. Other comments about the MOC process:                                                                                                        |              |  |                |
| Answered question                                                                                                                                |              |  | 254            |
| Skipped question                                                                                                                                 |              |  | 831            |
|                                                                                                                                                  |              |  | Response Count |
|                                                                                                                                                  |              |  | 254            |
